# Supplementary material for: Controlled charge injection into nitrogen for efficient electrochemical nitrogen reduction based on metal-on-boron compound catalysts
Source: Royal Society of Chemistry journal article supplement (doi:10.1039/d4ta04256e), 2024-01-01
Supplement: d4ta04256e1.pdf [file d4ta04256e1.pdf]

## Supporting Information

# Controlled charge injection into nitrogen for efficient electrochemical nitrogen reduction based on metal-on-boron compound catalysts

Yunji Han,<sup>†a,b</sup> Mihyeon Jo,<sup>†a,b</sup> Hyung-Kyu Lim<sup>\*c</sup> and Sangheon Lee<sup>\*a,b</sup>

<sup>a</sup>. Department of Chemical Engineering and Materials Science, Ewha Womans University, 52, Ewhayeodae-gil, Seodaemun-gu, Seoul 03760, Republic of Korea

<sup>b</sup>. Graduate Program in System Health Science and Engineering, Ewha Womans University, 52, Ewhayeodae-gil, Seodaemun-gu, Seoul 03760, Republic of Korea

<sup>c</sup>. Division of Chemical Engineering and Bioengineering, Kangwon National University, Chuncheon, Gangwon-do 24341, Republic of Korea

\* Corresponding authors: [hklim@kangwon.ac.kr](mailto:hklim@kangwon.ac.kr) (H.-K.L.), [sang@ewha.ac.kr](mailto:sang@ewha.ac.kr) (S.L.)

† The two authors are equally contributed.

**Table S1.** The vibrational and solvation energy quantities for dual Ru doped models.

| Model                          | $\alpha$ -sheets               |                                 |                                 | $\beta_{12}$ -sheets  |                  |                   |
|--------------------------------|--------------------------------|---------------------------------|---------------------------------|-----------------------|------------------|-------------------|
|                                | $\Delta E_{vib}$<br>(kcal/mol) | $\Delta S_{vib}$<br>(cal/mol·K) | $\Delta G_{solv}$<br>(kcal/mol) | $\Delta E_{vib}$ (eV) | $\Delta S_{vib}$ | $\Delta G_{solv}$ |
| *                              | -                              | -                               | -4.93                           | -                     | -                | -4.99             |
| *N <sub>2</sub>                | 6.02                           | 7.21                            | -2.77                           | 5.55                  | 11.13            | -3.30             |
| *N <sub>2</sub> H              | 12.78                          | 7.30                            | -5.54                           | 12.63                 | 9.87             | -6.05             |
| *N <sub>2</sub> H <sub>2</sub> | 20.35                          | 8.32                            | -6.16                           | 19.94                 | 11.21            | -6.75             |
| *N <sub>2</sub> H <sub>3</sub> | 27.28                          | 8.69                            | -7.45                           | 27.33                 | 10.73            | -9.70             |
| *N <sub>2</sub> H <sub>4</sub> | 33.50                          | 16.66                           | -7.44                           | 32.76                 | 15.46            | -7.34             |
| *NH <sub>2</sub>               | 16.64                          | 10.49                           | -6.13                           | 16.69                 | 9.78             | -6.25             |

**Table S2.** Structural information of catalyst models for DACs. The formation energy of DACs ( $\Delta E_f$ ) is calculated using  $\Delta E_f = E_{\text{TM}/\text{Boron}} - E_{\text{TM}} - E_{\text{Boron}}$ , where,  $E_{\text{TM}/\text{Boron}}$ ,  $E_{\text{TM}}$ , and  $E_{\text{Boron}}$  represent the energy of the metal-embedded boron sheet, the bulk metal, and the boron sheet, respectively. Distances between the active site and the boron sheet, as well as between two TMs, are listed as  $d_{\text{M-B}}$  and  $d_{\text{M-M}}$ , respectively. Cd and Zn adsorbed on  $\alpha$ -sheets do not exhibit stable binding states.

| TMs | $\alpha$ -sheets  |                      |                      | $\beta_{12}$ -sheets |                      |                      |
|-----|-------------------|----------------------|----------------------|----------------------|----------------------|----------------------|
|     | $\Delta E_f$ (eV) | $d_{\text{M-B}}$ (Å) | $d_{\text{M-M}}$ (Å) | $\Delta E_f$ (eV)    | $d_{\text{M-B}}$ (Å) | $d_{\text{M-M}}$ (Å) |
| Ag  | 1.138             | 2.452                | 5.132                | 0.558                | 2.548                | 2.913                |
| Cd  | -                 | -                    | -                    | 0.149                | 2.751                | 2.840                |
| Co  | 0.504             | 1.845                | 5.132                | 0.031                | 1.907                | 2.948                |
| Cr  | 1.721             | 2.246                | 5.131                | 0.845                | 2.287                | 2.883                |
| Cu  | 0.917             | 2.088                | 5.132                | 0.368                | 2.182                | 2.676                |
| Fe  | 0.945             | 1.988                | 5.133                | 0.470                | 2.046                | 2.834                |
| Mn  | 0.954             | 2.044                | 5.132                | 0.037                | 2.160                | 2.917                |
| Mo  | 2.439             | 2.125                | 5.132                | 1.369                | 2.188                | 2.294                |
| Nb  | 2.192             | 2.183                | 5.131                | 0.679                | 2.168                | 2.878                |
| Ni  | 0.399             | 1.922                | 5.132                | 0.382                | 2.099                | 2.525                |
| Pd  | 0.598             | 2.287                | 5.132                | 0.179                | 2.335                | 2.800                |
| Rh  | 0.979             | 2.198                | 5.131                | 0.693                | 2.198                | 2.749                |
| Ru  | 1.837             | 2.148                | 5.139                | 1.402                | 2.165                | 2.526                |
| Tc  | 2.164             | 2.118                | 5.132                | 1.368                | 2.144                | 2.527                |
| Ti  | 1.510             | 2.138                | 5.131                | -0.301               | 2.141                | 2.918                |
| V   | 1.734             | 2.083                | 5.133                | 0.146                | 2.043                | 2.923                |
| Zn  | -                 | -                    | -                    | 0.241                | 2.338                | 2.670                |
| Zr  | 1.790             | 2.284                | 5.128                | -0.163               | 2.273                | 3.056                |

**Table S3.** The formation energy of SACs on CeO<sub>2</sub> (111),  $\alpha$ -sheet,  $\beta_{12}$ -sheet. The formation energy of SACs ( $\Delta E_f$ ) is calculated using  $\Delta E_f = E_{\text{TM/Substrate}} - E_{\text{TM}} - E_{\text{Substrate}}$ , where,  $E_{\text{TM/Substrate}}$ ,  $E_{\text{TM}}$ , and  $E_{\text{Substrate}}$  represent the energy of the metal-embedded substrate, the bulk metal, and the substrate, respectively. (unit: eV)

| $\Delta E_f$ | CeO <sub>2</sub> | $\alpha$ -sheets | $\beta_{12}$ -sheets |
|--------------|------------------|------------------|----------------------|
| Pd           | 1.523            | 0.530            | 0.255                |
| Pt           | 1.158            | 0.388            | 0.018                |
| Ru           | 4.340            | 1.769            | 1.498                |

**Table S4.** Metal-metal distances ( $d_{M-M}$ ) of side-on N<sub>2</sub> adsorption structures with negative binding free energy. (unit: Å)

| TMs | $\alpha$ -sheets | $\beta_{12}$ -sheets |
|-----|------------------|----------------------|
| Cr  | 4.557            | 2.640                |
| Mn  | 4.570            | 2.725                |
| Mo  | 4.542            | 2.697                |
| Nb  | 4.660            | 2.875                |
| Ni  | 4.468            | -                    |
| Rh  | 4.527            | 2.841                |
| Ru  | 4.452            | -                    |
| Tc  | 4.406            | 2.641                |
| Ti  | 4.629            | 2.822                |
| V   | 4.543            | 2.700                |
| Zr  | 4.752            | 3.009                |

**Table S5.** Average partial charge values at each TMs of bare catalyst based on the Bader charge analysis. (unit:  $|e|$ )

| TMs | $\alpha$ -sheets | $\beta_{12}$ -sheets |
|-----|------------------|----------------------|
| Ag  | 0.228            | 0.261                |
| Cd  | -                | 0.345                |
| Co  | -0.098           | 0.129                |
| Cr  | 0.700            | 0.692                |
| Cu  | 0.285            | 0.294                |
| Fe  | 0.387            | 0.511                |
| Mn  | 0.561            | 0.692                |
| Mo  | 0.568            | 0.510                |
| Nb  | 0.944            | 0.985                |
| Ni  | 0.224            | 0.219                |
| Pd  | -0.046           | -0.042               |
| Rh  | -0.084           | -0.030               |
| Ru  | 0.198            | 0.231                |
| Tc  | 0.254            | 0.284                |
| Ti  | 1.096            | 0.945                |
| V   | 0.898            | 0.805                |
| Zn  | -                | 0.444                |
| Zr  | 1.194            | 1.039                |

**Table S6.** Average partial charge values at each TMs and average partial charge values of N for N<sub>2</sub> adsorbed catalyst based on the Bader analysis method. (unit: |e|)

| TMs | $\alpha$ -sheets |        | $\beta_{12}$ -sheets |        |
|-----|------------------|--------|----------------------|--------|
|     | @TMs             | @N     | @TMs                 | @N     |
| Ag  | 0.365            | -0.134 | 0.333                | -0.042 |
| Cd  | -                | -      | 0.595                | -0.128 |
| Co  | 0.377            | -0.170 | 0.349                | -0.111 |
| Cr  | 0.949            | -0.378 | 1.000                | -0.386 |
| Cu  | 0.387            | -0.074 | 0.370                | -0.049 |
| Fe  | 0.445            | -0.144 | 0.411                | -0.096 |
| Mn  | 0.776            | -0.285 | 0.908                | -0.334 |
| Mo  | 0.856            | -0.389 | 0.962                | -0.428 |
| Nb  | 1.305            | -0.458 | 1.585                | -0.516 |
| Ni  | 0.189            | -0.107 | 0.336                | -0.133 |
| Pd  | 0.156            | -0.155 | 0.122                | -0.076 |
| Rh  | 0.137            | -0.217 | 0.239                | -0.224 |
| Ru  | 0.313            | -0.304 | 0.319                | -0.235 |
| Tc  | 0.545            | -0.386 | 0.648                | -0.399 |
| Ti  | 1.314            | -0.470 | 1.353                | -0.411 |
| V   | 1.126            | -0.393 | 1.207                | -0.416 |
| Zn  | -                | -      | 0.684                | -0.171 |
| Zr  | 1.615            | -0.637 | 1.672                | -0.500 |

**Table S7.** Average partial charge values of N<sub>2</sub> molecule adsorbed on DACs , corresponding N<sub>2</sub> adsorption free energies, and COHP-calculated metal-N<sub>2</sub> binding strength (denoted as ICOHP@E<sub>F</sub>).

| TMs | Partial charge @ N ( e ) |              | $\Delta G_{N_2}$ (eV) |              | ICOHP@E <sub>F</sub> (eV) |              |
|-----|--------------------------|--------------|-----------------------|--------------|---------------------------|--------------|
|     | $\alpha$                 | $\beta_{12}$ | $\alpha$              | $\beta_{12}$ | $\alpha$                  | $\beta_{12}$ |
| Ag  | -0.134                   | -0.042       | 0.54                  | 0.47         | -2.00                     | -1.61        |
| Cd  |                          | -0.128       |                       | 0.79         |                           | -1.08        |
| Co  | -0.170                   | -0.111       | 0.28                  | 0.99         | -3.18                     | -2.83        |
| Cr  | -0.378                   | -0.386       | -0.55                 | -0.73        | -2.82                     | -2.43        |
| Cu  | -0.074                   | -0.049       | 0.26                  | 0.14         | -2.23                     | -2.16        |
| Fe  | -0.144                   | -0.096       | 0.07                  | -0.44        | -2.65                     | -2.61        |
| Mn  | -0.285                   | -0.334       | -0.24                 | -0.08        | -2.27                     | -1.83        |
| Mo  | -0.389                   | -0.428       | -1.05                 | -0.91        | -3.22                     | -2.77        |
| Nb  | -0.458                   | -0.516       | -1.12                 | -1.30        | -3.83                     | -2.79        |
| Ni  | -0.107                   | -0.133       | -0.10                 | -0.16        | -2.55                     | -2.56        |
| Pd  | -0.155                   | -0.076       | 0.13                  | 0.22         | -1.94                     | -2.19        |
| Rh  | -0.217                   | -0.224       | -0.28                 | -0.13        | -2.36                     | -2.34        |
| Ru  | -0.304                   | -0.235       | -0.28                 | -0.36        | -2.89                     | -2.05        |
| Tc  | -0.386                   | -0.399       | -1.23                 | -0.81        | -3.43                     | -3.24        |
| Ti  | -0.470                   | -0.411       | -1.41                 | -1.49        | -3.02                     | -2.02        |
| V   | -0.393                   | -0.416       | -1.00                 | -0.77        | -2.86                     | -2.26        |
| Zn  |                          | -0.171       |                       | 0.44         |                           | -1.63        |
| Zr  | -0.637                   | -0.500       | -1.74                 | -1.56        | -4.12                     | -2.60        |



**Table S8.** Differences (denoted as  $\Delta q @ \text{TM}$ ) in the average partial charge value at each TM after and before the  $\text{N}_2$  adsorption. Average partial charge values (denoted as  $q @ \text{N}$ ) of N for  $\text{N}_2$  adsorbed catalyst. Calculations are based on the Bader analysis method. (unit:  $|e|$ )

|    | $\Delta q @ \text{TM}$ |              | $q @ \text{N}$ |              |
|----|------------------------|--------------|----------------|--------------|
|    | $\alpha$               | $\beta_{12}$ | $\alpha$       | $\beta_{12}$ |
| Ag | 0.137                  | 0.072        | -0.134         | -0.042       |
|    |                        | 0.250        |                | -0.128       |
| Co | 0.475                  | 0.220        | -0.170         | -0.111       |
| Cr | 0.249                  | 0.308        | -0.378         | -0.386       |
| Cu | 0.102                  | 0.076        | -0.074         | -0.049       |
| Fe | 0.058                  | -0.100       | -0.144         | -0.096       |
| Mn | 0.215                  | 0.216        | -0.285         | -0.334       |
| Mo | 0.288                  | 0.452        | -0.389         | -0.428       |
| Nb | 0.361                  | 0.600        | -0.458         | -0.516       |
| Ni | -0.035                 | 0.117        | -0.107         | -0.133       |
| Pd | 0.202                  | 0.164        | -0.155         | -0.076       |
| Rh | 0.221                  | 0.269        | -0.217         | -0.224       |
| Ru | 0.115                  | 0.088        | -0.304         | -0.235       |
| Tc | 0.291                  | 0.364        | -0.386         | -0.399       |
| Ti | 0.218                  | 0.408        | -0.470         | -0.411       |
| V  | 0.228                  | 0.402        | -0.393         | -0.416       |
|    |                        | 0.240        |                | -0.171       |
| Zr | 0.421                  | 0.633        | -0.637         | -0.500       |

**Table S9.** Average partial charge value (unit:  $|e|$ ) at each TM (denoted as q @ TM) on bare  $\alpha$ - and  $\beta_{12}$ -sheets and calculated H<sub>2</sub>O adsorption free energies (denoted as  $\Delta G_{\text{H}_2\text{O}}$ ) (unit: eV).

|    | q @ TM   |              | $\Delta G_{\text{H}_2\text{O}}$ |              |
|----|----------|--------------|---------------------------------|--------------|
|    | $\alpha$ | $\beta_{12}$ | $\alpha$                        | $\beta_{12}$ |
| Ag | 0.228    | 0.261        | 0.294                           | 0.681        |
| Cd |          | 0.345        |                                 | 0.293        |
| Co | -0.098   | 0.129        | 0.154                           | 0.005        |
| Cr | 0.700    | 0.692        | 0.044                           | -0.054       |
| Cu | 0.285    | 0.294        | 0.224                           | -0.002       |
| Fe | 0.387    | 0.511        | 0.147                           | -0.160       |
| Mn | 0.561    | 0.692        | 0.009                           | -0.097       |
| Mo | 0.568    | 0.51         | 0.046                           | 0.280        |
| Nb | 0.944    | 0.985        | -0.621                          | -0.161       |
| Ni | 0.224    | 0.219        | 0.178                           | 0.050        |
| Pd | -0.046   | -0.042       | 0.402                           | 0.055        |
| Rh | -0.084   | -0.03        | 0.320                           | 0.121        |
| Ru | 0.198    | 0.231        | 0.242                           | 0.146        |
| Tc | 0.254    | 0.284        | 0.260                           | 0.137        |
| Ti | 1.096    | 0.945        | -0.782                          | -0.417       |
| V  | 0.898    | 0.805        | -0.364                          | -0.021       |
| Zn |          | 0.444        |                                 | 0.048        |
| Zr | 1.194    | 1.039        | -1.252                          | -0.261       |

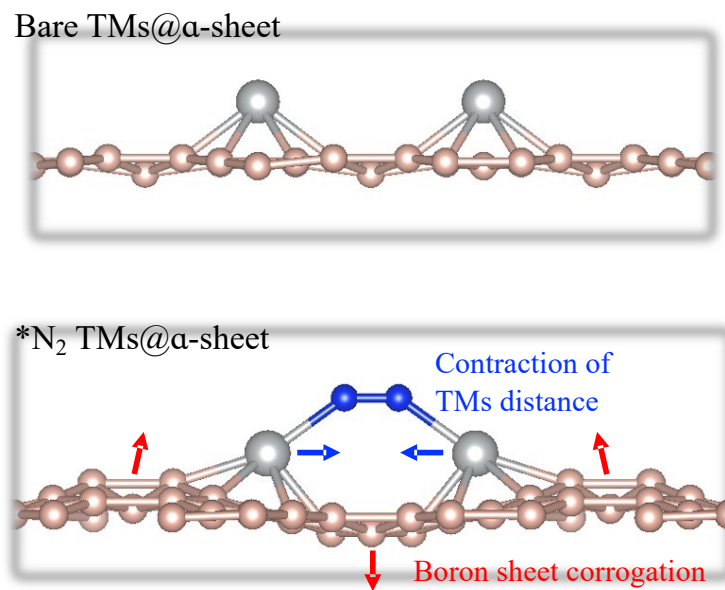

**Figures S1.** Structural changes of TMs on  $\alpha$ -sheet after side-on N<sub>2</sub> adsorption.

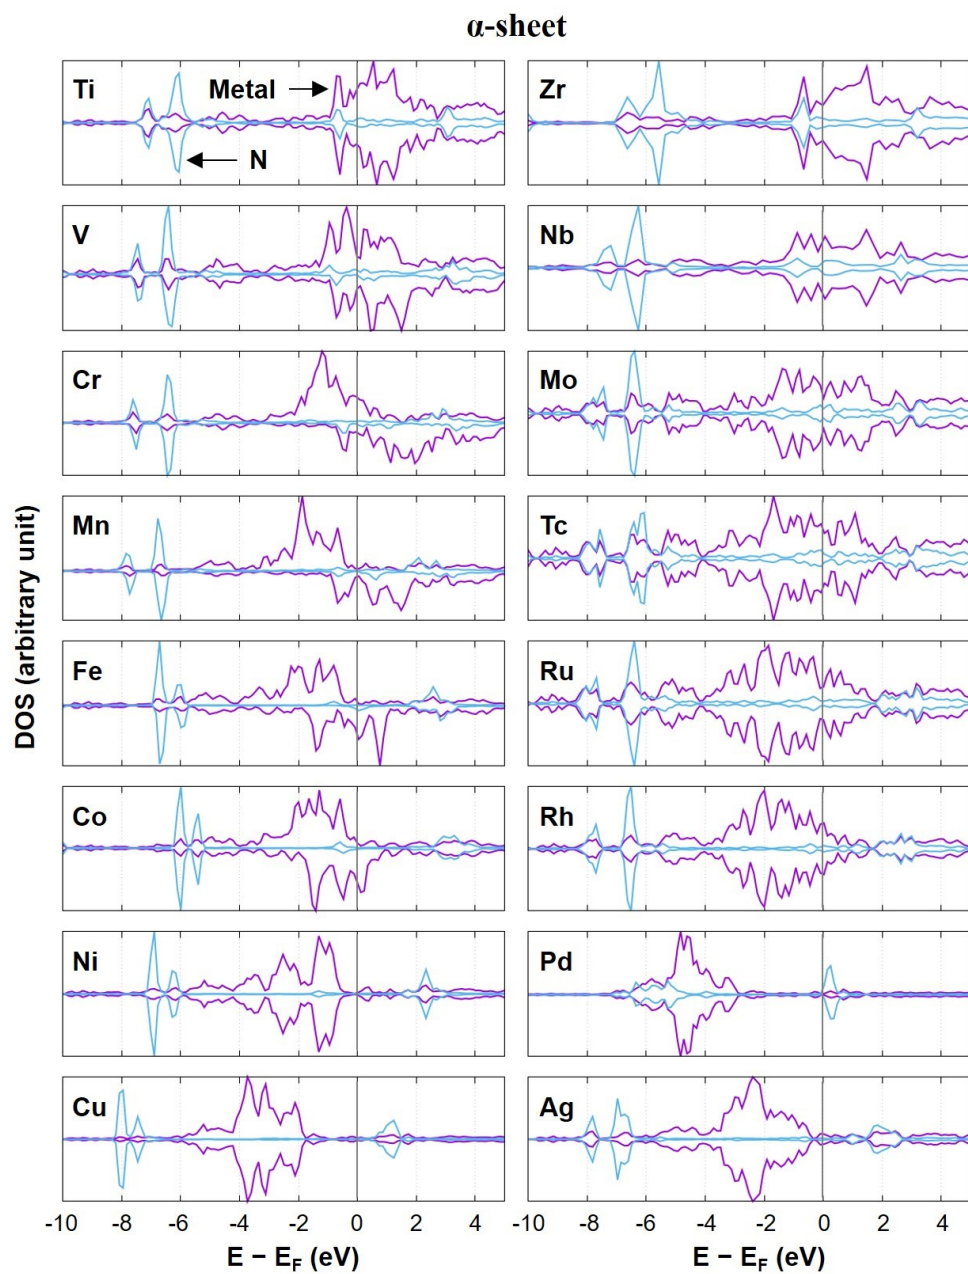

**Figures S2.** Partial density of states (pDOS) analysis of  $N_2$  and TMs on  $\alpha$ -sheets for the most stable  $N_2$  adsorption structures (see **Figure 1**).

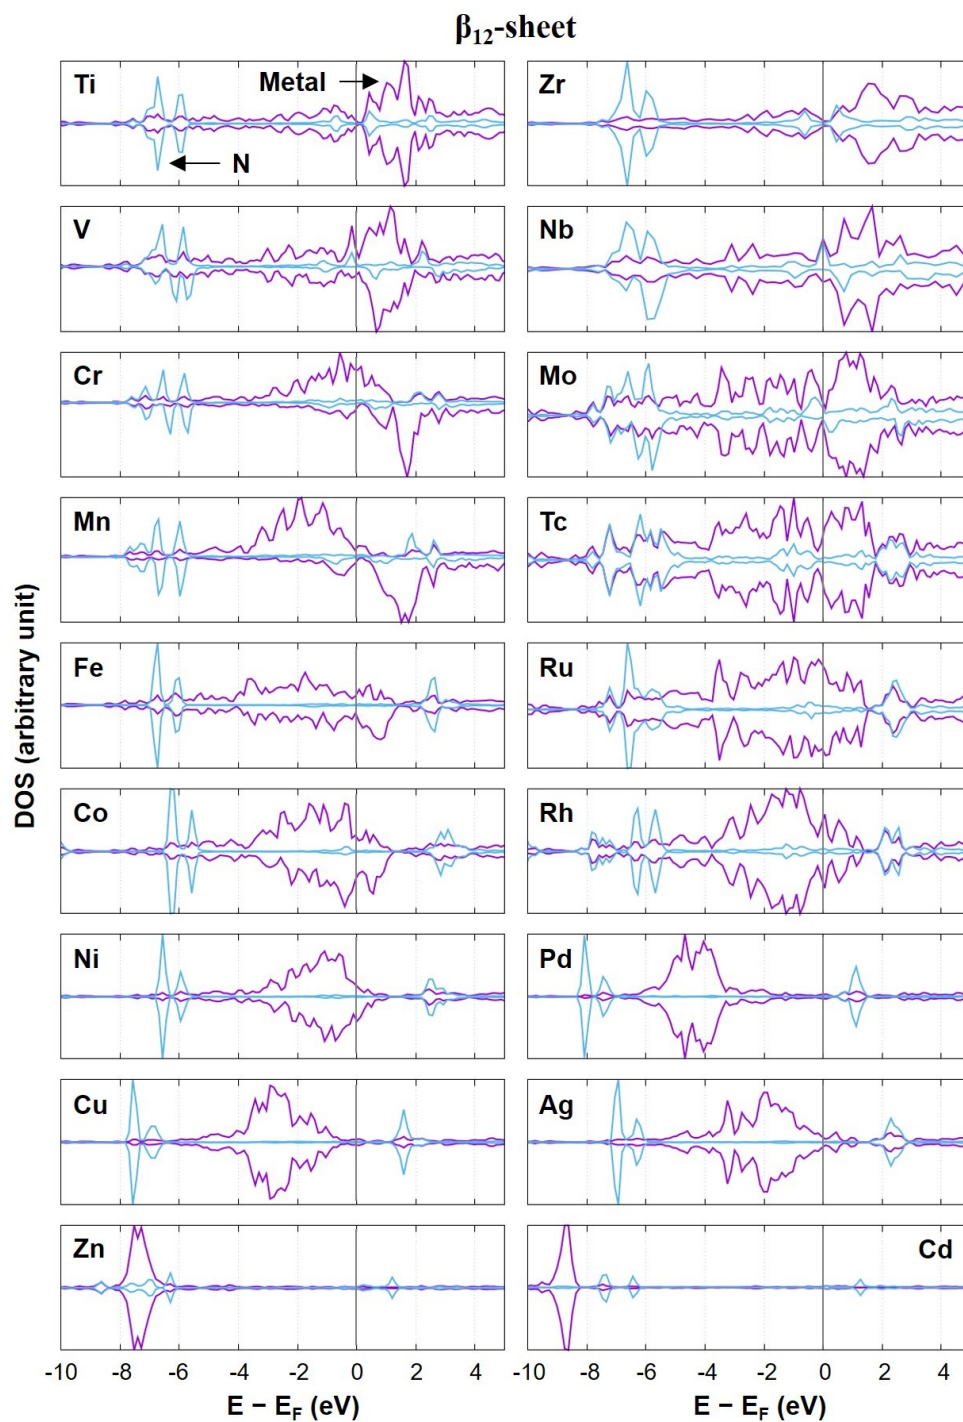

**Figures S3.** Partial density of states (pDOS) analysis of  $N_2$  and TMs on  $\beta_{12}$ -sheets for the most stable  $N_2$  adsorption structures (see **Figure 1**).

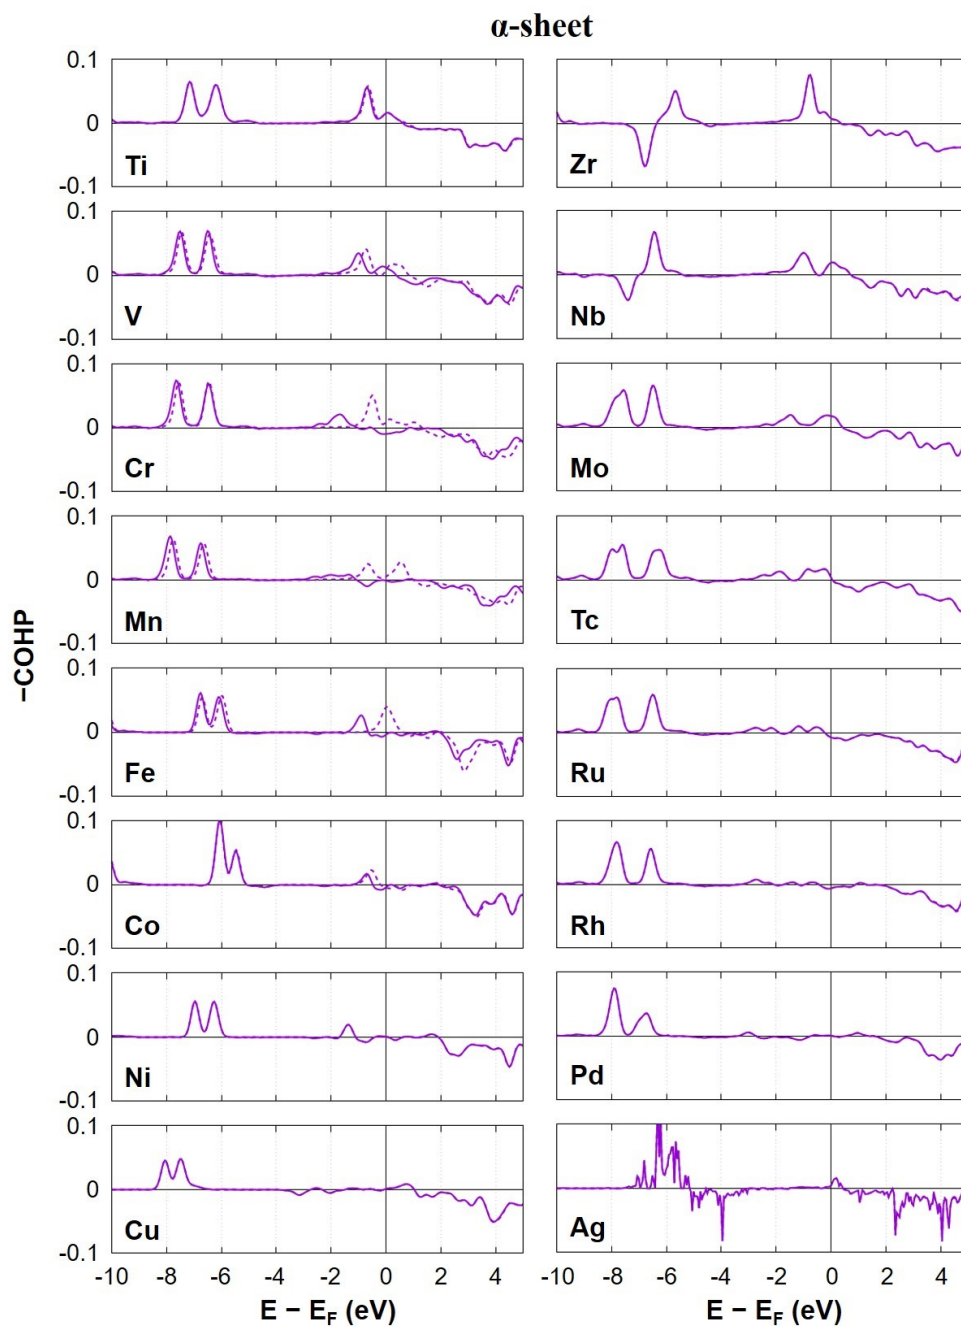

**Figures S4.** Crystal orbital Hamiltonian projection (COHP) analysis of TM-N<sub>2</sub> bonding on  $\alpha$ -sheets for the most stable N<sub>2</sub> adsorption structures (see **Figure 1**). Solid and dot lines denote spin-up and spin-down states, respectively.

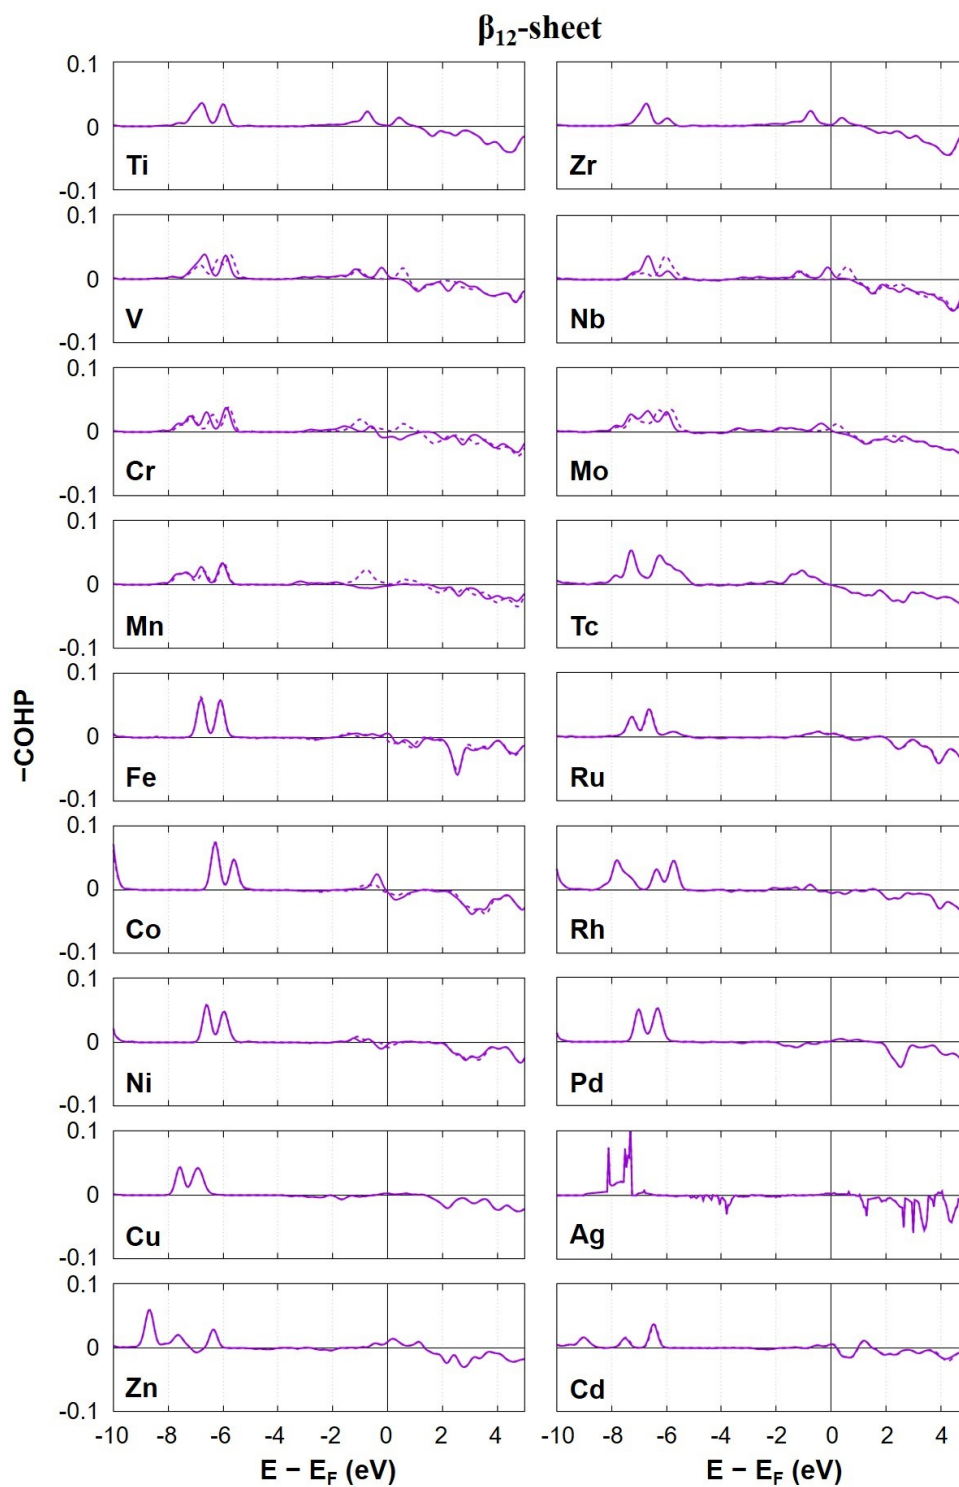

**Figures S5.** Crystal orbital Hamiltonian projection (COHP) analysis of TM-N<sub>2</sub> bonding on  $\beta_{12}$ -sheets for the most stable N<sub>2</sub> adsorption structures (see **Figure 1**). Solid and dot lines denote spin-up and spin-down states, respectively.

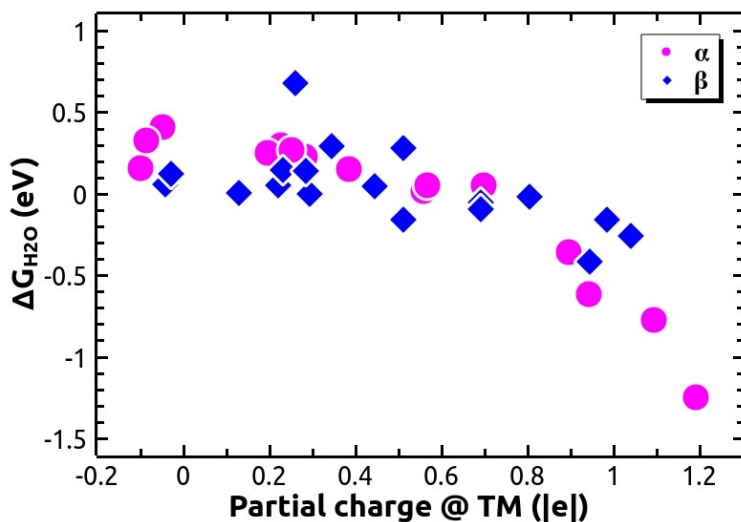

**Figures S6.** Calculated H<sub>2</sub>O adsorption free energies as a function of the partial charge at TM on  $\alpha$ -sheets (denoted as  $\alpha$ ) and  $\beta_{12}$ -sheets (denoted as  $\beta$ ). Calculations of the partial charge are based on the Bader analysis method. Refer to raw data in **Table S9**.

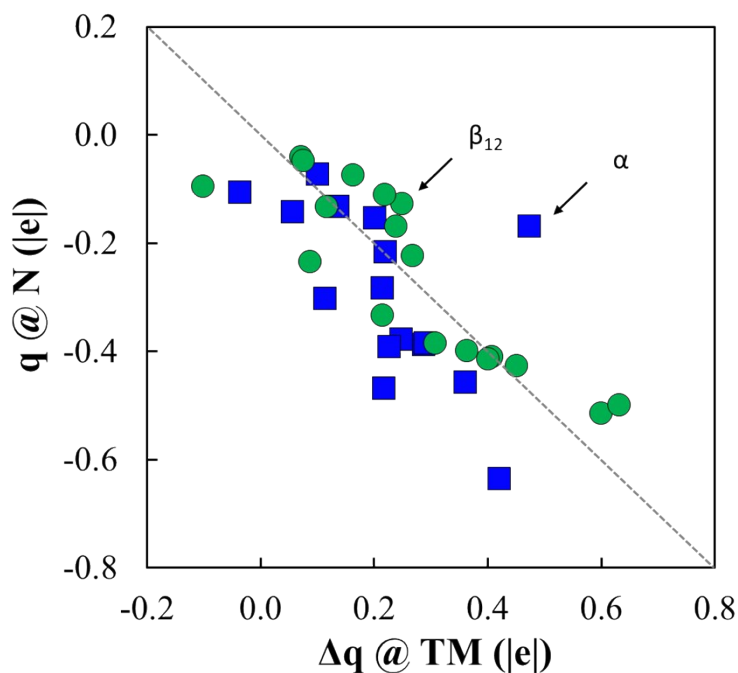

**Figures S7.** Correlation between differences (denoted as  $\Delta q @ \text{TM}$ ) in the average partial charge value at each TM after and before the N<sub>2</sub> adsorption and average partial charge values (denoted as  $q @ \text{N}$ ) of N for N<sub>2</sub> adsorbed catalyst. Calculations are based on the Bader analysis method. Refer to raw data in **Table S8**. (unit: |e|)



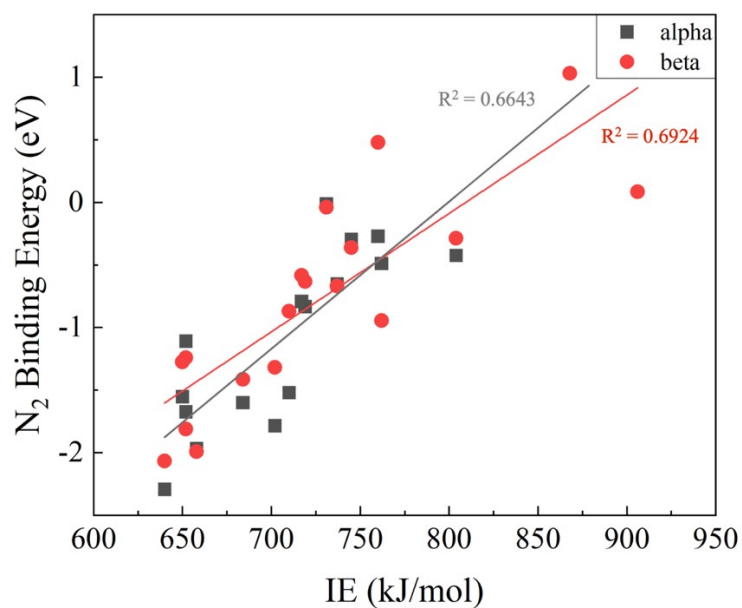

**Figure S8.** Correlation between TMs 1<sup>st</sup> electron ionization energy (source: <https://ptable.com>) and N<sub>2</sub> binding energy.

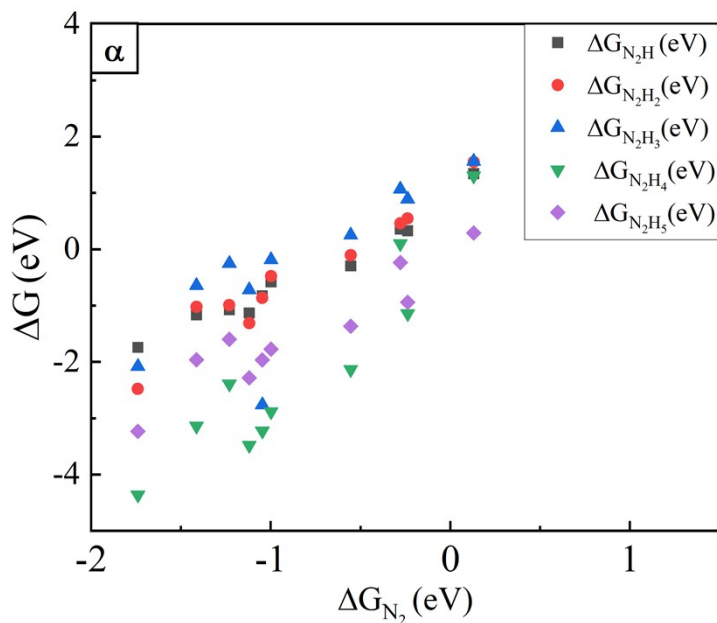

**Figure S9.** Linear correlations between binding free energies of N<sub>2</sub> and N<sub>2</sub>H, N<sub>2</sub>H<sub>2</sub>, N<sub>2</sub>H<sub>3</sub>, N<sub>2</sub>H<sub>4</sub>, N<sub>2</sub>H<sub>5</sub> for TMs on α-sheet.

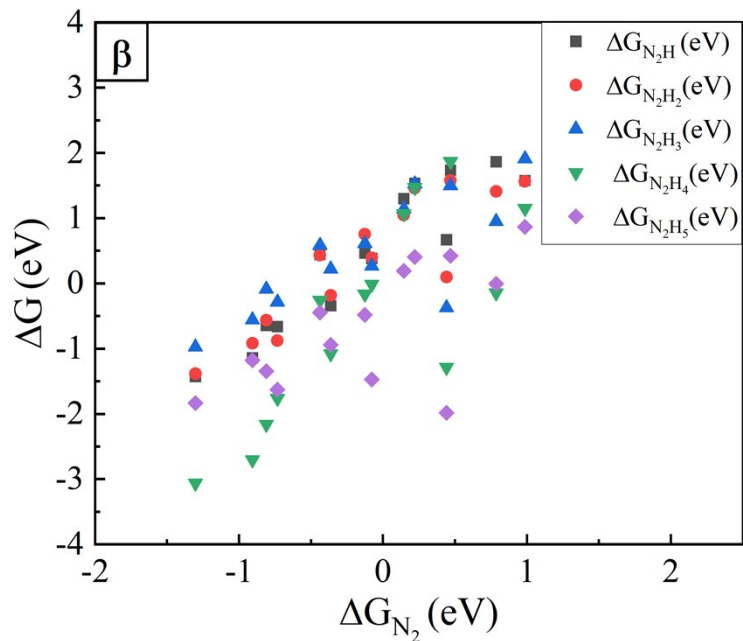

**Figure S10.** Linear correlations between binding free energies of  $N_2$  and  $N_2H$ ,  $N_2H_2$ ,  $N_2H_3$ ,  $N_2H_4$ ,  $N_2H_5$  for TMs on  $\beta_{12}$ -sheet.

**Distal pathway:  $*N_2$  end-on (Ag, Co, Cu, Fe, Ni)**

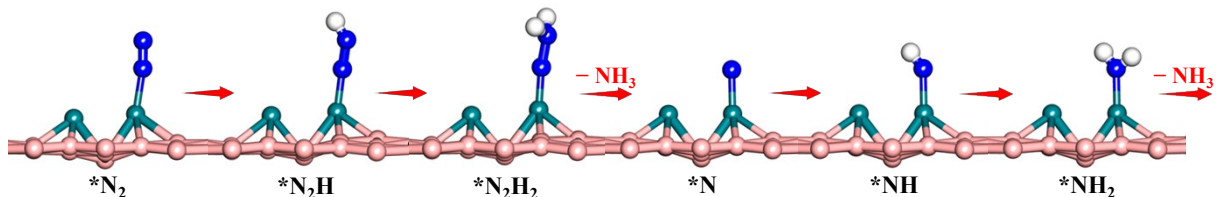

**Enzymatic pathway:  $*N_2$  side-on (Cr, Mn, Mo, Nb, Pd, Rh, Ru, Tc, Ti, V, Zr)**

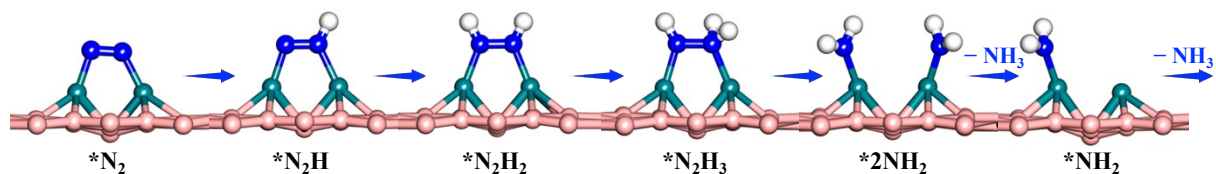

**Figure S11.** Conventional reaction pathways for eNRR.

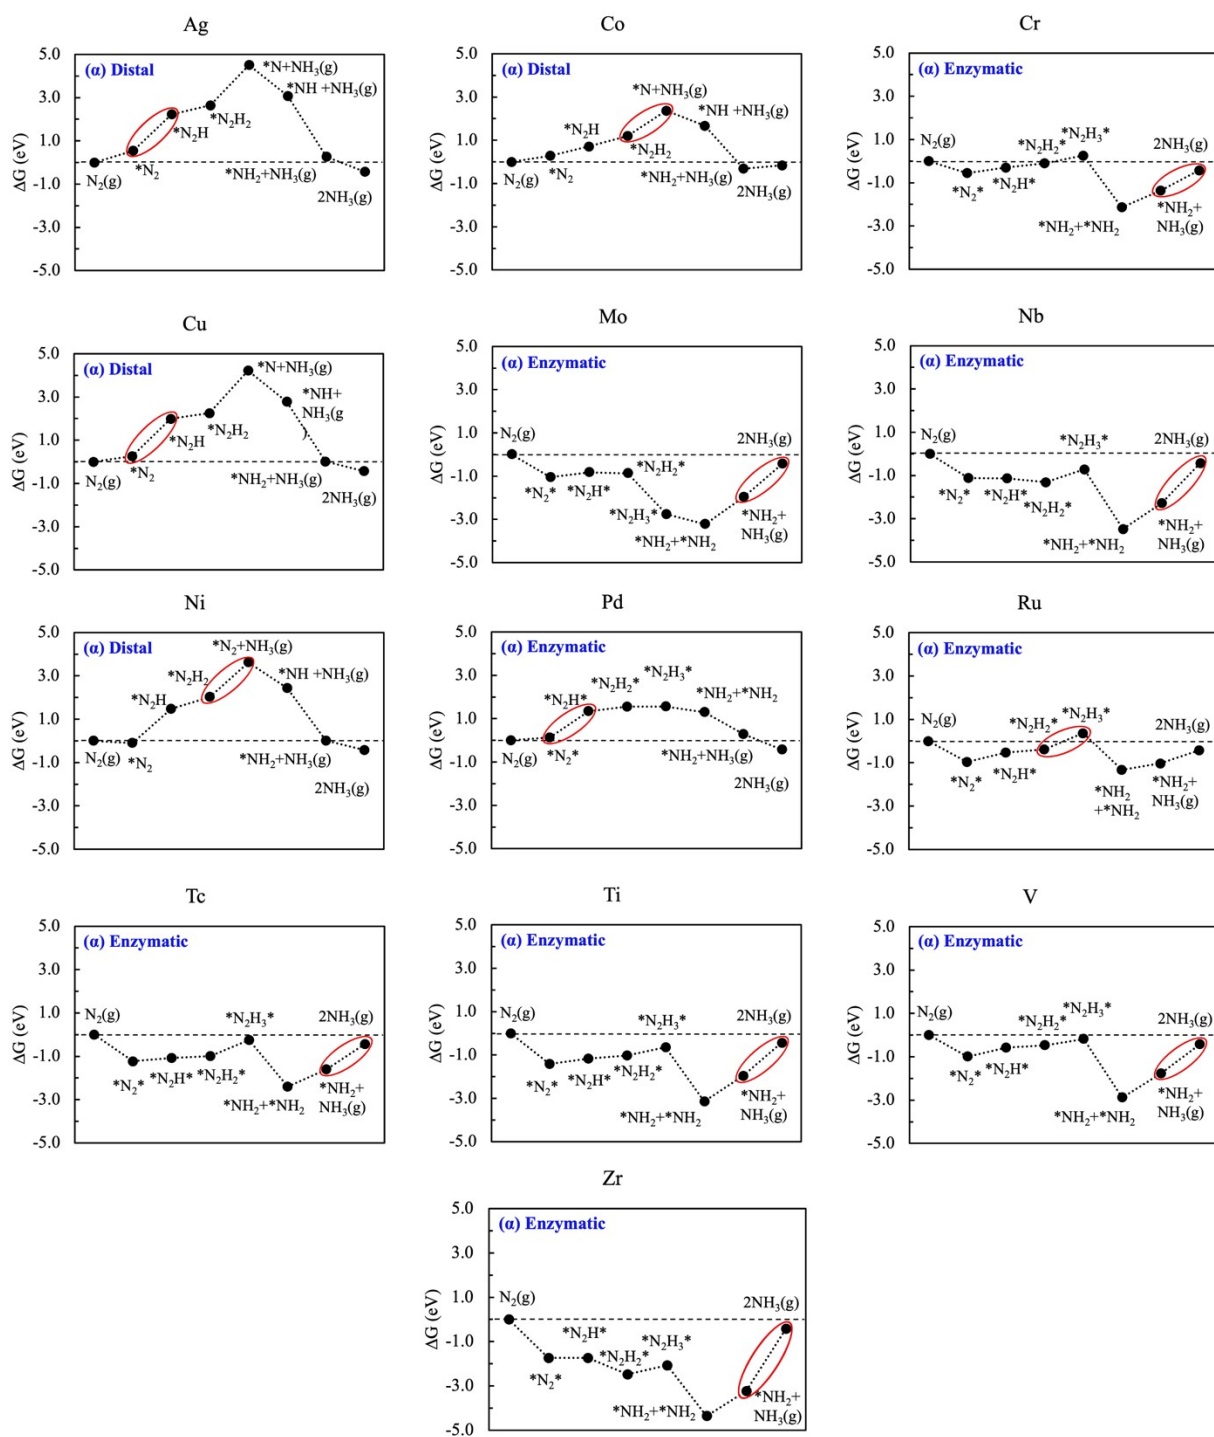

**Figure S12.** Gibbs free energy profiles for overall eNRR pathway on TMs@ $\alpha$ -sheet.

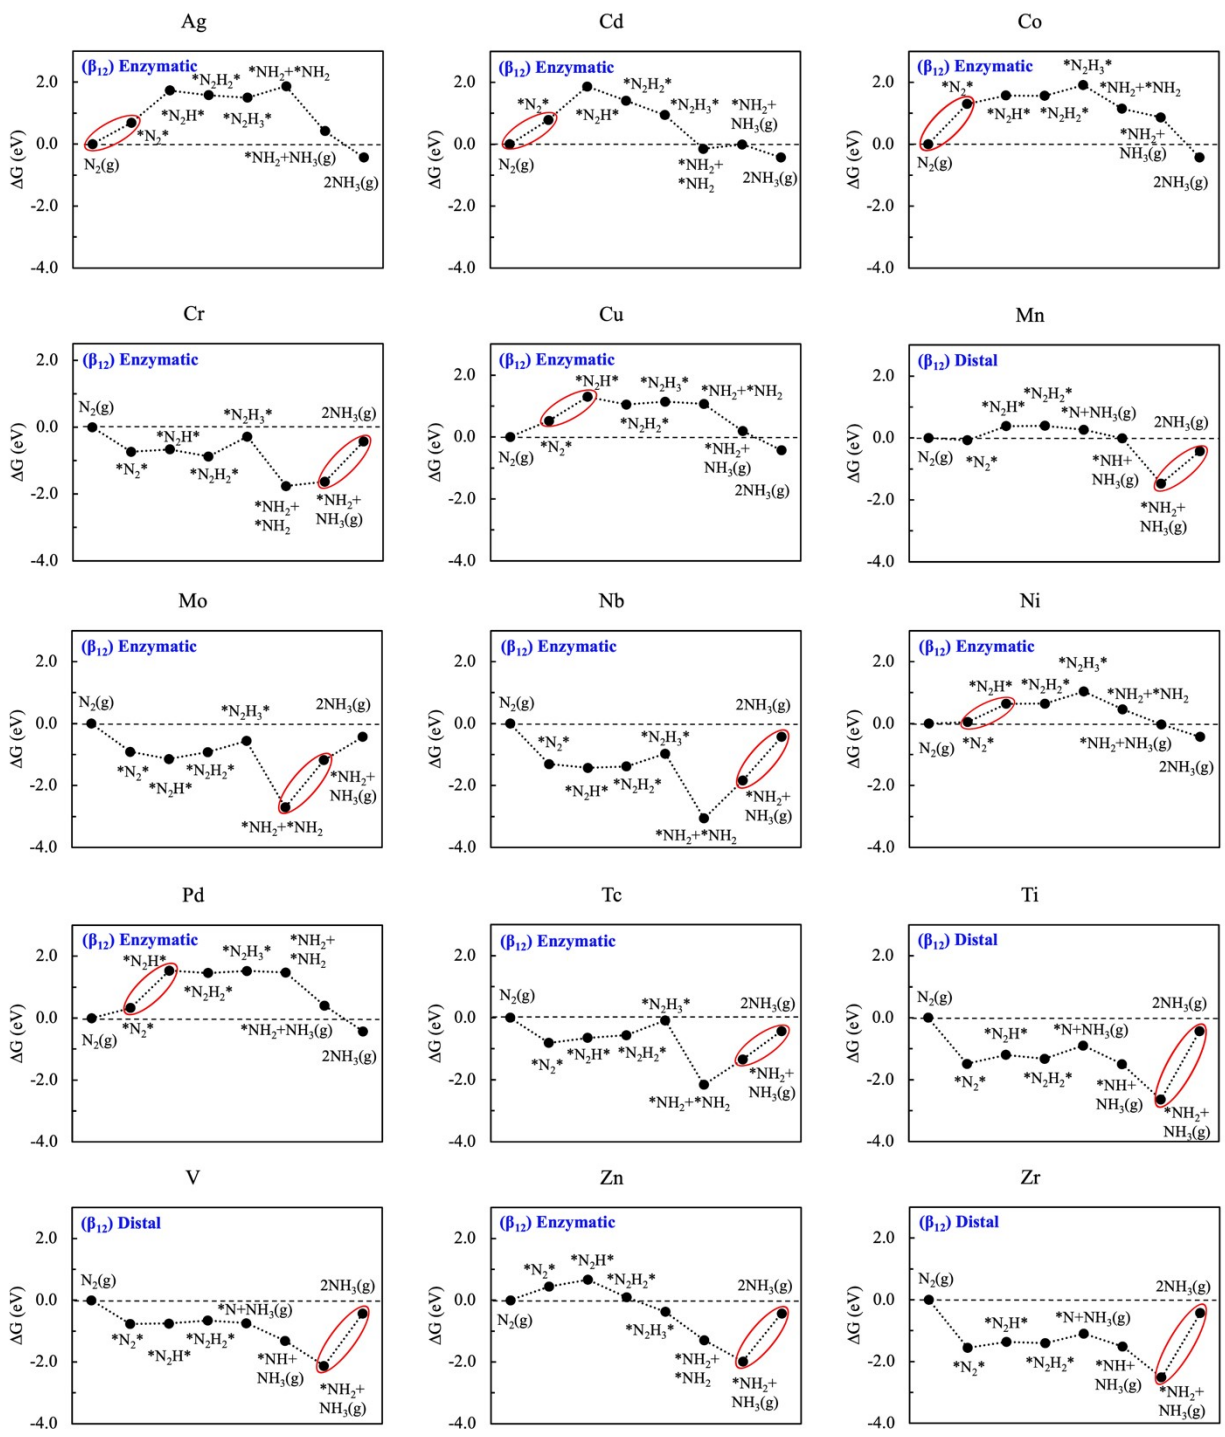

**Figure S13.** Gibbs free energy profiles for overall eNRR pathway on TMs@ $\beta_{12}$ -sheet.
